# Supplementary material for: Polypharmacy in older patients with chronic diseases: a cross-sectional analysis of factors associated with excessive polypharmacy
Source: Springer Nature journal article supplement (doi:10.1186/s12875-018-0795-5), 2018-07-18
Supplement: MOESM2 [file 12875_2018_795_MOESM2_ESM.pdf]

|                                                 |     |              |     |              |     |              |     |              |     |              |
|-------------------------------------------------|-----|--------------|-----|--------------|-----|--------------|-----|--------------|-----|--------------|
| Managing well                                   | 245 | 41.7         | 415 | 42.3         | 255 | 34.4         | 376 | 41.7         | 352 | 50.8         |
| Vulnerable                                      | 124 | 21.1         | 229 | 23.3         | 178 | 24.0         | 170 | 18.9         | 167 | 24.1         |
| Mildly frail                                    | 91  | 15.5         | 158 | 16.1         | 125 | 16.8         | 171 | 19.0         | 115 | 16.6         |
| Moderately frail                                | 84  | 14.3         | 139 | 14.2         | 144 | 19.4         | 92  | 10.2         | 46  | 6.6          |
| Severely frail                                  | 21  | 3.6          | 28  | 2.9          | 19  | 2.6          | 23  | 2.5          | 6   | 0.9          |
| Very severely frail                             | 2   | 0.3          | 2   | 0.2          | 4   | 0.5          | 0   | 0.0          | 0   | 0.00         |
| Physical health composite score, median (range) | 509 | 36.7 (13-62) | 948 | 35.9 (12-63) | 713 | 35.0 (11-62) | 675 | 38.7 (11-68) | 639 | 37.5 (10-60) |
| Mental health composite score, median (range)   | 506 | 47.6 (16-74) | 946 | 48.6 (12-72) | 715 | 47.5 (17-76) | 676 | 46.8 (14-72) | 640 | 53.5 (16-74) |
| Substances <8                                   | 259 | 44.1         | 351 | 35.8         | 334 | 45.0         | 439 | 48.7         | 261 | 37.7         |
| ≥10                                             | 328 | 55.9         | 630 | 64.2         | 408 | 55.0         | 462 | 51.3         | 432 | 62.3         |
| n (mean ±SD)                                    | 587 | 10.4 ±2.3    | 981 | 10.9 ±2.7    | 742 | 10.4 ±2.4    | 901 | 10.0 ±2.0    | 693 | 10.9 ±2.7    |
| Diagnoses, n (mean ±SD)                         | 587 | 8.5±3.5      | 981 | 12.9 ±6.2    | 742 | 10.4 ±4.5    | 901 | 7.6 ±2.7     | 693 | 6.8 ±3.5     |

Legend: BMI= Body Mass Index, Germany 1= Rostock, Germany 2= Witten, SD= Standard deviation
