# Supplementary material for: Polypharmacy in older patients with chronic diseases: a cross-sectional analysis of factors associated with excessive polypharmacy
Source: Springer Nature journal article supplement (doi:10.1186/s12875-018-0795-5), 2018-07-18
Supplement: MOESM3 [file 15961818]

**Additional file III** Percentage of the population using substances (ATC level 5) according to polypharmacy status

| Substances |                                   | All subjects |      | Polypharmacy<br><10 substances |      | Excessive polypharmacy<br>≥10 substances |      |
|------------|-----------------------------------|--------------|------|--------------------------------|------|------------------------------------------|------|
|            |                                   | n            | (%)  | n                              | (%)  | n                                        | (%)  |
| B01AC06    | acetylsalicylic acid <sup>3</sup> | 1662         | 42.6 | 665                            | 40.5 | 997                                      | 44.1 |
| C10AA01    | simvastatin                       | 1597         | 40.9 | 650                            | 39.5 | 947                                      | 41.9 |
| C03AA03    | hydrochlorothiazide               | 1243         | 31.8 | 514                            | 31.3 | 729                                      | 32.3 |
| C07AB07    | bisoprolol <sup>2</sup>           | 1199         | 30.7 | 480                            | 29.2 | 719                                      | 31.8 |
| A02BC02    | pantoprazole <sup>1</sup>         | 1125         | 28.8 | 390                            | 23.7 | 735                                      | 32.5 |
| C08CA01    | amlodipine <sup>2</sup>           | 1096         | 28.1 | 451                            | 27.4 | 645                                      | 28.5 |
| C09AA05    | ramipril                          | 1089         | 27.9 | 500                            | 30.4 | 589                                      | 26.1 |
| A11CC05    | colecalfiferol                    | 1048         | 8    | 331                            | 20.1 | 717                                      | 31.7 |
| H03AA01    | levothyroxine sodium              | 931          | 23.8 | 338                            | 20.6 | 593                                      | 26.2 |
| C03CA04    | torasemide                        | 905          | 23.2 | 295                            | 17.9 | 610                                      | 27.0 |

1= potentially inappropriate medication according to EU(7)-PIM list

2= recommended alternative drug according to EU(7)-PIM list

3= recommended alternative drug (<325 mg) according to EU(7)-PIM list
